# Supplementary material
Source: MDPI journal article supplement (https://www.mdpi.com/2078-1547/6/1/88)
Supplement: s1 [file s1]

## Sheet: Sheet1
Number	Entry of Date	Site_name	Author	Country	Rs_annual_Original(Diversed Units)	Latitude	Longitude	Elevation	Biome	Ecosystem_type	Ecosystem_state	Species	Leaf_habit	Stage	Soil_type	MAT(°C)	MAP(mm)
1	17/04/2013	Pointe Noire	Epron et al.,2004	Congo	11.2µmol/m2/yr	-4	12	100	Tropical	Forest	Managed	Eucalyptus	Evergreen	Aggrading	Arenosol	25	1200
2	17/04/2013	Pointe Noire	Epron et al., 2006	Congo	1570 gC/m2/yr	-4.21	11.45	100	Tropical	Forest	Managed	Eucalyptus	Evergreen	Aggrading	Arenosol	26.4	1048
3	17/04/2013	Kondi	Epron et al., 2006	Congo	16.6µmol/m2/yr	-4.35	11.75	100	Tropical	Forest	Managed	Eucalyptus	Evergreen	Aggrading	Arenosol (sandy)	25	1400
4	17/04/2013	Kondi	Epron et al., 2006	Congo	16.6µmol/m2/yr	-4.38	11.8	100	Tropical	Forest	Managed	Eucalyptus	Evergreen	Aggrading	Arenosol (sandy)	25	1400
5	17/04/2013	Kissoko	Nouvellon et al., 2008	Congo	662gC/m2/yr	-4.44	12.01	100	Tropical	Forest	Managed	Eucalyptus spp.	Deciduous	Aggrading	Ferralic arenosol	25	1274
6	17/04/2013	Kissoko	Nouvellon et al., 2008	Congo	653gC/m2/yr	-4.74	12.02	100	Tropical	Forest	Managed	Eucalyptus spp.	Deciduous	Aggrading	Ferralic arenosol	25	1274
7	17/04/2013	Esali	Bond-Lamberty & Thomson 2010	DRC	1520gC/m2/yr	0.8	23.73	100	Tropical	Forest	Natural	Gilbertiodendron spp.	Evergreen	Mature	Ferralitic arenosols	24.4	1875
8	17/04/2013	Esali	Bond-Lamberty & Thomson 2010	DRC	1170gC/m2/yr	0.8	23.74	100	Tropical	Forest	Natural	Brachystegia spp.	Evergreen	Mature	Ferralitic	24.4	1875
9	17/04/2013	Esali	Bond-Lamberty & Thomson2010	DRC	1140gC/m2/yr	0.8	23.75	100	Tropical	Forest	Natural	Scorodophloeus spp.	Evergreen	Mature	Ferralitic	24.4	1875
10	17/04/2013	Esali	Bond-Lamberty & Thomson 2010	DRC	1240gC/m2/yr	0.8	23.76	100	Tropical	Forest	Natural	Mixed	Evergreen	Mature	Ferralitic	24.4	1875
11	17/04/2013	Okavango Delta	Mantlana et al., 2007	Botswana	9.4μmol/m2/yr	-19.25	22.75	1000	Temperate	Grassland	Natural	Dry	Deciduous	Mature	Calcretes	25	1200
12	17/04/2013	Okavango Delta	Mantlana et al., 2007	Botswana	7.7μmol/m2/yr	-19.25	22.76	1000	Temperate	Wetland	Natural	Mixed	Deciduous	Mature	Calcretes	25	1200
13	17/04/2013	Okavango Delta	Mantlana et al., 2007	Botswana	7.7μmol/m2/yr	-19.25	22.77	1000	Temperate	Wetland	Natural	Wet	Deciduous	Mature	Calcretes	25	1200
14	17/04/2013	Ouidah	Lamade et al., 1996	Benin	1610gC/m2/yr	6.23	2.08	16	Tropical	Forest	Managed	Elaeis guineensis	Evergreen	Mature	Ferralsol	27	950
15	17/04/2013	Bontioli Reserve	Brummer et al., 2009	Burkina Faso	5.81tC ha/yr	10.51	-3.04	293	Tropical	Savanna	Natural	Andropogon gayanus; Loudetiopsis kerstingii	Deciduous	Mature	Sandy loam	29.5	926
16	17/04/2013	Bontioli Reserve	Brummer et al., 2009	Burkina Faso	3.85tC ha/yr	10.52	-3.03	295	Tropical	Savanna	Natural	Andropogon gayanus; Loudetiopsis kerstingii	Deciduous	Mature	Sandy loam	29.5	926
17	22/04/2013	Atlantic Coast	Caquet et al., 2012	Congo	3.175μmol/m2/yr	-4.17	11.39	80	Tropical	Grassland	Natural	C4 grass Loudetia simplex(Nees)	Evergreen	Mature	Ferralitic arenosols	25	1200
18	22/04/2013	Crop sites	Brummer et al., 2009	Burkina Faso	3.51tC/ha/yr	11.09	-3.05	318	Tropical	Agriculture	Managed	Mixed	Deciduous	Mature	Loam/sandy loam	29.5	926
19	22/04/2013	Crop sites	Brummer et al., 2009	Burkina Faso	4.84tC/ha/yr	11.09	-3.07	322	Tropical	Savanna	Natural	Mixed	Deciduous	Mature	Loam/sandy loam	29.5	926
20	24/04/2013	Kruger National Park	Makhado et al 2011	South Africa	0.512gC/m2/h/y	-25.01	31.23	365	Tropical	Savanna(combretum and acacia)	Natural	Mixed	Deciduous	Mature	Granite	44	547
21	24/04/2013	Machakos	Nyeberg et al., 2000	Kenya	170gC/m2/yr	-1.33	37.14	1600	Tropical	Agriculture	Managed	Maize	Deciduous	Mature	Kandic Rhodustalf	25	760
22	24/04/2013	Solomon Mahlanga Campus of Sokoine University of Agriculture	Sugihara et al., 2012	Tanzania	1.4mgC/ha/yr	-6.47	37.37	579	Tropical	AgricultureManaged	Managed	Mixed	Deciduous	Mature	Sand-Ustic Quartz	24.5	700
23	24/04/2013	Agric experimental station of Sokoine University of Agriculture, Morogoro	Sugihara et al., 2012	Tanzania	1.63mgC/ha/1yr	-6.5	37.39	512	Tropical	Agriculture	Managed	Mixed	Deciduous	Mature	Clay-Kanhaplic Haplustults	24.5	850
24	24/04/2013	Wondo Genet	Teklay et al., 2006	Ethiopia	1.45mgC/ha/yr)	-7.06	38.37	1925	Tropical	Agriculture	Managed	Mixed	Deciduous	Mature	Volcanic soils(Mollic and Sols	19.5	1240
25	25/04/2013	50km from Niamey	Verhoef et al., 1996	Niger	2.85μmol/m2/yr	13.32	2.3	218	Tropical	Savanna	Natural	Mixed	Deciduous	Mature	Sandy	40	450
26	29/04/2013	Ruhande Arboretum, South Rwanda	Nsabimana et al., 2009&2008	Rwanda	13.5 mgC/ha/yr	-2.36	29.44	11687.5	Tropical	Forest plantations	Managed	Mixed	Deciduous	Mature	Ferralsols	19	1200
27	29/04/2013	Nyungwe	Nsabimana et al., 2009	Rwanda	10.2 mgC/ha/yr	-2.17	29.07	2275	Tropical	Forest	Natural	Mixed	Evergreen	Mature	Volcanic soils	14.4	1400
28	2013-09-05	Lamto	Mordelet ert al 1993	Cote d'Ivoire	0.96gC/ kg/yr	6.13	-5.02	75	Tropical	Savanna	Managed	Mixed	Evergreen	Mature	Ferrogenous	28	1300
29	2013-09-05	Mzuzu	Ngwira et al., 2012	Malawi	7.53gC/kg/yr	-12.15	33.19	1252	Tropical	Agriculture	Managed	Mixed	Evergreen	Mature	Ferralsols	19.6	1258.5
30	2013-10-05	Gambella	Michelsen et al., 2004	Ethiopia	284mgC/ha/yr	7.48	34.17	575	Tropical	Wooded grassland	Managed	Mixed	Evergreen	Mature	Ferralsols	14.4	1285
31	2013-10-05	Dossi-p1	Gnankambary et al., 2008	Burkina Faso	290μgC/h/yr	11.22	-3.17	350	Tropical	Forest	Managed	Mixed	Evergreen	Mature	Ferralsols	27	1200
32	2013-10-05	Dossi-p2	Gnankambary et al., 2008	Burkina Faso	450μgC/h/yr	11.24	-3.2	350	Tropical	Forest	Managed	Maize	Deciduous	Mature	Lixisols	20	1100
33	14/5/2013	Dossi-p3	Gnankambary et al., 2008	Burkina Faso	120μgC/h/yr	11.28	-3.26	350	Tropical	Forest	Managed	Mixed	Evergreen	Mature	Vertisols	25	850
34	14/5/2013	Dossi-p4	Gnankambary et al., 2008	Burkina Faso	180μgC/h/yr	11.3	-3.3	350	Tropical	Forest	Natural	Mixed	Deciduous	Mature	Chromic Cambisols and Eutric Regosols	37	1050
35	14/5/2013	Makoka	Kim 2012	Malawi	51.2mgC/ha/yr	-15.4	35.15	1029	Tropical	Agric and Grassland	Natural	Mixed	Deciduous	Mature	Chromic Cambisols and Eutric Regosols	37	1050
36	14/5/2013	Makoka	Makumba et al., 2007	Malawi	149mgC/ha/yr	-15.3	35.15	1029	Tropical	Agric and Grassland	Natural	Mixed	Deciduous	Mature	Chromic Cambisols and Eutric Regosols	37	1050
37	14/5/2013	Wakiso	Koerber et al., 2009	Uganda	104.4 tC/ha/yr	0.24	32.29	1200	Tropical	Agriculture	Natural	Mixed	Deciduous	Mature	Chromic Cambisols and Eutric Regosols	37	1050
38	14/5/2013	Kakamega	Werner et al., 2007	Kenya	71 gC/m2/yr	0.17	34.51	1560	Tropical	Forest	Managed	Mixed	Deciduous	Mature	Ferric Lixisols	24	930
39	14/5/2013	Niamey	Petdotova et al., 2010	Niger	25 mgC/ha/yr	13.5	2.1	223	Tropical	Urban-Gardens	Managed	Mixed	Deciduous	Mature	Ferric Lixisols	24	930
40	14/5/2013	Zomba	Makumba et al., 2006	Malawi	6 Cg/kg/yr	-30	15	1029	Tropical	Agriculture	Managed	Mixed	Deciduous	Mature	Rhodic Ferralsols	21	1375
41	15/5/2013	Thioulaye	Yelemou et al., 2013	Burkina Faso	800Cµg/g/yr	12.5	-2.25	300	Tropical	Agriculture	Natural	Mixed	Evergreen	Mature	Ferralsols	26	2080
42	15/5/2013	Gompossom	Yelemou et al., 2013	Burkina Faso	400Cµg/g/yr	12.3	-2.25	300	Tropical	Agriculture	Managed	Mixed	Deciduous	Mature	Sandy	28.5	542
43	15/5/2013	Thioulaye	Yelemou et al., 2013	Burkina Faso	400Cµg/g/yr	12.1	-2.25	300	Tropical	Agriculture	Managed	Mixed	Deciduous	Mature	Ferric Lixisols	23	937
44	15/5/2013	Thioulaye	Yelemou et al., 2013	Burkina Faso	450Cµg/g/yr	11.5	-2.25	300	Tropical	Agriculture	Managed	Mixed	Deciduous	Mature	Lithosols	40	500
45	15/5/2013	Thioulaye	Yelemou et al., 2013	Burkina Faso	400Cµg/g/yr	11.35	-2.25	300	Tropical	Agriculture	Managed	Mixed	Deciduous	Mature	Lithosols	35	640
46	17/5/2013	Munessa-Shashemene	Yohannes et al., 2011	Ethiopia	162µmol/Cm-2/yr	7.25	38.51	2272.5	Tropical	Forest	Managed	Mixed	Deciduous	Mature	Lithosols	35	730
47	28/5/2013	Site 1	Traore et al., 2007	Burkina Faso	617µg/g/yr	12	0.9	400	Tropical	Forest	Managed	Mixed	Deciduous	Mature	Lithosols	28	810
48	28/5/2013	Site 2	Traore et al., 2007	Burkina Faso	583µg/g/yr	11.8	0.3	400	Tropical	Forest	Managed	Mixed	Deciduous	Mature	Lithosols	26	900
49	28/5/2013	Site 3	Traore et al., 2007	Burkina Faso	301µg/g/yr	11.3	0.33	400	Tropical	Forest	Managed	Mixed	Evergreen	Mature	Mollic Nitisols	15	1200
50	28/5/2013	Site 4	Traore et al., 2007	Burkina Faso	314µg/g/yr	13.28	0.5	400	Tropical	Forest	Managed	Mixed	Evergreen	Mature	Eutric -Skeletic Cambisol	25	800
51	28/5/2013	Site 5	Traore et al., 2007	Burkina Faso	489µg/g/yr	11.05	0.3	200	Tropical	Forest	Managed	Mixed	Evergreen	Mature	Eutric -Vertic Cambisol	25	850
52	28/5/2013	Site 6	Traore et al., 2007	Burkina Faso	524µg/g/yr	11.45	0.3	400	Tropical	Forest	Managed	Mixed	Evergreen	Mature	Eutric Vertisol	25	880
53	15/02/2014	Southern Kalahari	Thomas 2012	Botswana	60g C/m-2/y-1	-25.56	22.25	1150	Temperate arid	Grassland	Managed	Mixed	Evergreen/Deciduous	Mature	Kalahari sands	31	331
54	15/02/2014	Southern Kalahari	Thomas 2012	Botswana	80mg C/m-2h/y-1	-25.56	22.25	1150	Temperate arid	Grassland	Managed	Mixed	Evergreen/Deciduous	Mature	Calcrete soils	31	331
55	16/02/2014	Tsabong	Thomas et al., 2008	Botswana	31.74mgC/m2/y-1	-25.56	22.25	1150	Temperate arid	Bare	Natural	Bare	Arid	Bare	Kalahari sands	34	350
56	16/02/2014	Ntwetwe Pan	Thomas et al., 2014	Botswana	66.95mgC/m-2/y-1	-20.29	25.07	890.02	Temperate	Grassland/Woodland	Natural	Saline grasses and Palmwood	Evergreen	Mature	Pan soils(Solonchaks)	35.4	545
57	20/02/2014	Kouilou District	Castaldiet et al., 2010	Congo	8841.6 mgC/m-2Y-1	11.8	12.74	82	Tropical	Savana	Natural	Mixed	Deciduous	Mature	Ferralitic arenosols	25	1200
58	20/02/2014	Khawa	Thomas et al., 2011	Botswana	400mgC/m-2y-1	-26.25	21.35		Temperate	Grassland	Natural	Mixed	Deciduous	Mature	Kalahari sands	25	220
59	20/02/2014	Tsabong	Thomas et al., 2011	Botswana	400mgC/m-2y-1	-25.56	22.25		Temperate	Grassland	Managed	Mixed	Deciduous	Mature	Kalahari sands	25	290
60	20/02/2014	Tshane	Thomas et al., 2011	Botswana	1400mgC/m-2y-1	-24.11	21.51		Temperate	Woody shrubs	Natural	Mixed	Deciduous	Mature	Kalahari sands	25	340
61	20/02/2014	Takatshwaane	Thomas et al., 2011	Botswana	13000mgC/m-2y-1	-22.47	21.57		Temperate	Trees, grass and shrubs	Natural	Mixed	Deciduous	Mature	Kalahari sands	20	350
62	20/02/2014	Ngami	Thomas et al., 2011	Botswana	2000mgC/m-2y-1	20.42	22.3		Temperate	Trees, grass and shrubs	Natural	Mixed	Deciduous	Mature	Kalahari sands	20	420
